# Supplementary material for: Carbazole-based near-infrared-emitting fluorescence probe for the detection of bisulfite in live animals and real food samples
Source: Royal Society of Chemistry journal article supplement (doi:10.1039/d2nj04647d), 2022-01-01
Supplement: d2nj04647d1.pdf [file d2nj04647d1.pdf]

**Electronic Supplementary Material (ESI) for New Journal of Chemistry. This journal is © The Royal Society of Chemistry 2022**

## **Electronic Supplementary Information**

**Carbazole-based near-infrared emitted fluorescence probe for the detection of bisulfite in live animals and real food samples**

Zhuye Shang,<sup>a</sup> Jianhua Liu,<sup>a</sup> Qingtao Meng,<sup>\*a,b</sup> Hongmin Jia,<sup>a</sup> Yun Gao,<sup>\*a</sup> Cheng Zhang,<sup>a</sup> Run Zhang<sup>c</sup> and Zhiqiang Zhang<sup>\*b</sup>

<sup>a</sup> School of Chemical Engineering, University of Science and Technology Liaoning, Anshan, Liaoning Province, 114051, P. R. China.

E-mail: qtmeng@ustl.edu.cn (Q. T. Meng), yuner9111@163.com (Y. Gao), Tel.: +86-412-5929637

<sup>b</sup> Key Laboratory for Functional Material, Educational Department of Liaoning Province, University of Science and Technology Liaoning, Anshan, Liaoning Province 114051, PR China.

E-mail address: zzq@ustl.edu.cn (Z. Q. Zhang), Tel.: +86-412-5928002

<sup>c</sup> Australian Institute for Bioengineering and Nanotechnology, The University of Queensland, St Lucia 4072, Australia

## Materials

9-Phenyl-9H-carbazol-3-ylboronic acid, 5-bromothiophene-2-carbaldehyde, 1,3-indanedione and tetrabutylammonium cyanide, dithiothreitol, thioglycol and mercaptopurine were received from Aladdin reagent Co. (Shanghai, China). Potassium carbonate ( $K_2CO_3$ ), hydrogen peroxide ( $H_2O_2$ ), piperidine, anions (sodium salts), hypochlorite ( $NaOCl$ ), thiophenol and sodium cetyltrimethylammonium bromide (CTAB) were purchased from Sinopharm Chemical Reagent Co., Ltd. (China). All of the experimental live nude mice (6 to 8-week-old) and zebrafish were obtained from Liaoning Changsheng Biotechnology Co., Ltd., and the experiments were performed in compliance with the relevant laws and guidelines. Unless otherwise stated, solvents and reagents were of analytical grade from commercial suppliers and were used without further purification.

## Apparatus

$^1H$  NMR and  $^{13}C$  NMR spectra were recorded with an AVANCE 400 MHz spectrometer (Bruker) with chemical shifts reported as ppm (in Chloroform-*d*, DMSO-*d*<sub>6</sub> and D<sub>2</sub>O, TMS as an internal standard). Mass spectra were recorded on an Agilent 6530 QTOF spectrometer. Absorption spectra were tested with a Perkin Elmer Lambda 900 UV/VIS/NIR spectrophotometer. Fluorescence spectra were recorded with a Spectrofluorometer FS5 luminescence spectrometer. All pH measurements were made with an OHAUS Starter 3100/f meter. Imaging of  $HSO_3^-$  in zebrafish and mice were performed on a SPECTRAL Ami Imaging Systems (Spectral Instruments Imaging, LLC, Tucson, AZ) with an excitation filter 500 nm and an

emission filter 710 nm. Amiview Analysis software (Version 1.7.06) was used to calculate fluorescence intensity in region of interest (ROI), and values are presented as the mean  $\pm$  SD for each group of three experiments.

### Quantum yield measurement.

The relative fluorescence quantum yields of **QPM** before and after reacting with  $\text{HSO}_3^-$  were determined by using fluorescein as the reference ( $\Phi_f = 0.85$  in 0.1 M NaOH aqueous solutions). After the measurements of UV-Vis and fluorescence spectra ( $\lambda_{\text{ex}}=490$  nm), the quantum yield of the corresponding compounds were determined using the equation<sup>S1</sup>.

$$\Phi_{\text{unk}} = \Phi_{\text{std}} \frac{(F_{\text{unk}}/A_{\text{unk}})}{(F_{\text{std}}/A_{\text{std}})} \left( \frac{\eta_{\text{unk}}}{\eta_{\text{std}}} \right)^2$$

Where  $\Phi_{\text{std}}$ ,  $F_{\text{std}}$ ,  $A_{\text{std}}$ , and  $\eta_{\text{std}}$  are the quantum yield, integrated fluorescence intensity, absorbance, and refraction of the standard solution, respectively.  $\Phi_{\text{unk}}$ ,  $F_{\text{unk}}$ ,  $A_{\text{unk}}$ , and  $\eta_{\text{unk}}$  represent the quantum yield, integrated fluorescence intensity, absorbance, and refraction of the sample solution, respectively. All of the spectroscopic measurements were performed in triplicate and averaged.

#### (1) Calculation of fluorescence quantum yield ( $\Phi_1$ ) of **QPM**:

The measured data of **QPM** were  $\Phi_{\text{std}}=0.85$ ,  $F_{\text{std}}=165646394.50$ ,  $A_{\text{std}}=0.2849$ ,  $\eta_{\text{std}}=1.3812$ ,  $F_{\text{unk}}=108469230.27$ ,  $A_{\text{unk}}=0.2993$  and  $\eta_{\text{unk}}= 1.3853$ , respectively. Put the above data into the formula and calculate  $\Phi_1=0.5329$ .

#### (2) Calculation of fluorescence quantum yield ( $\Phi_2$ ) of **QPM-SO<sub>3</sub>H**:

The measured data of **QPM-SO<sub>3</sub>H** were  $\Phi_{\text{std}}=0.85$ ,  $F_{\text{std}}=165646394.5$ ,  $A_{\text{std}}=0.2849$ ,  $\eta_{\text{std}}=1.3812$ ,  $F_{\text{unk}}=219667.32$ ,  $A_{\text{unk}}=0.0391$  and  $\eta_{\text{unk}}=1.3546$ , respectively. Put the

above data into the formula and calculate  $\Phi_1=0.0079$ .

### MTT assay of cytotoxicity of QPM in A549 cells

The cytotoxicity of **QPM** to live A549 cells was investigated by MTT assays<sup>S2</sup>.

The following formula was used to calculate the viability of cell growth:

Viability (%)=(mean of absorbance value of treatment group-blank)/(mean absorbance value of control-blank) $\times$ 100.

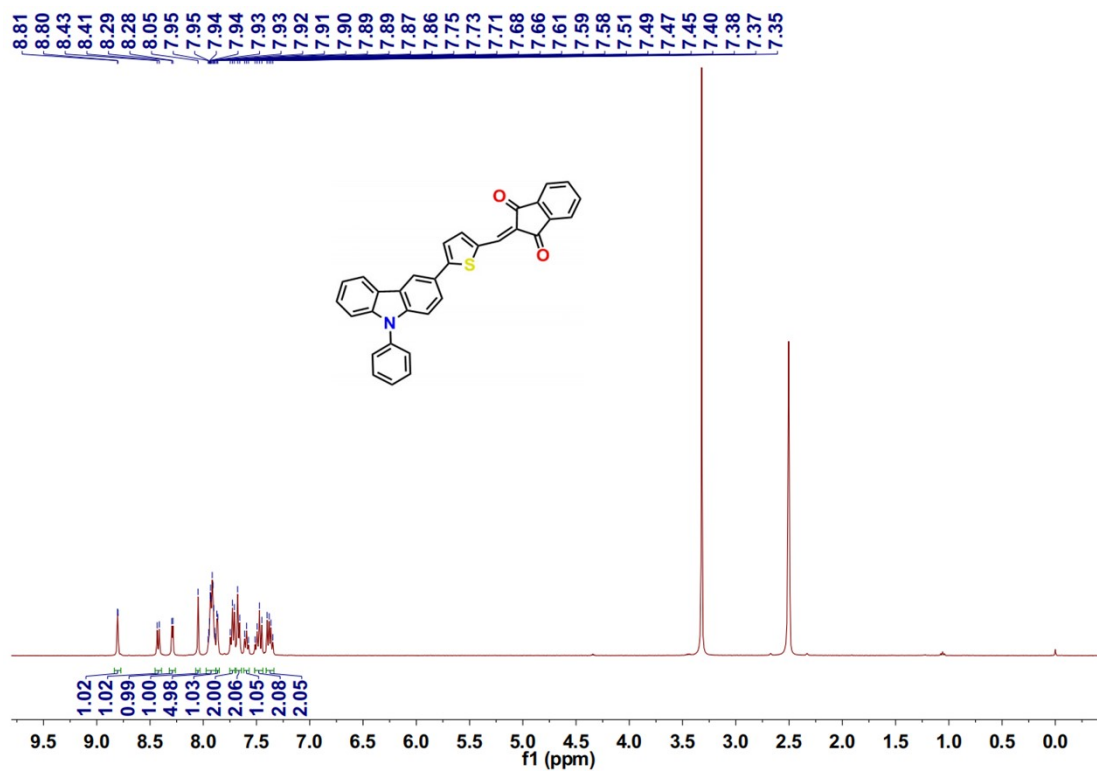

Fig. S1 <sup>1</sup>H NMR of QPM (DMSO-d<sub>6</sub>, 400 MHz).

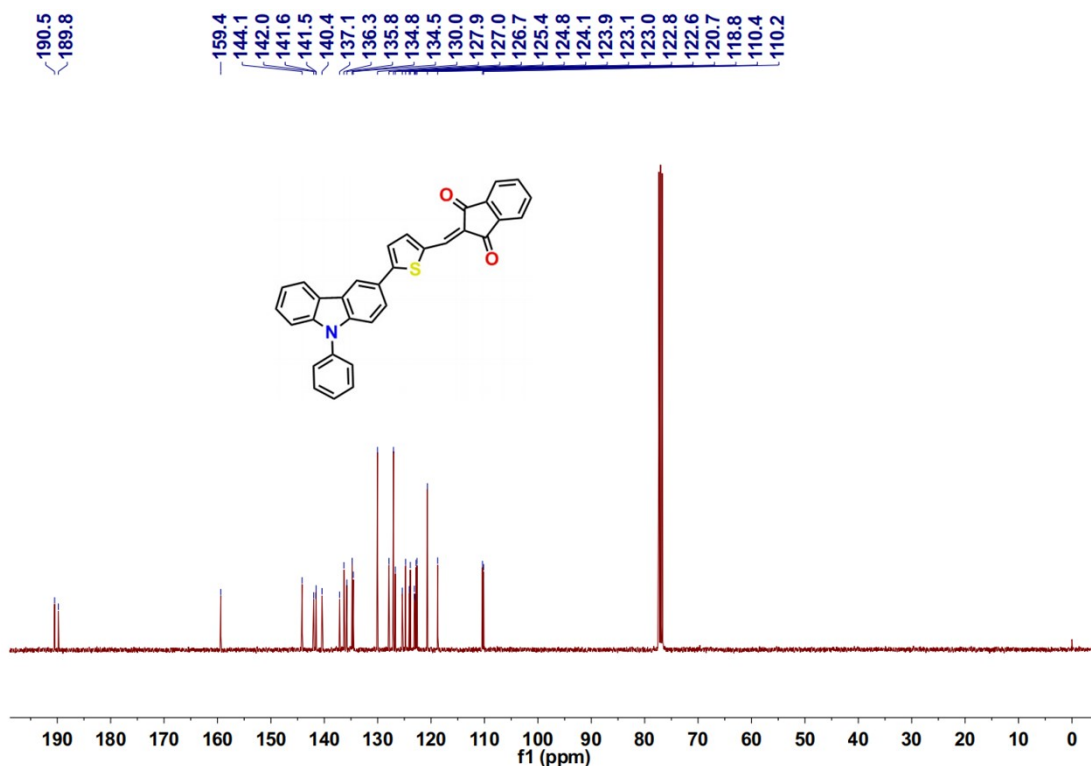

Fig. S2  $^{13}\text{C}$  NMR of QPM (Chloroform- $d$ , 101 MHz).

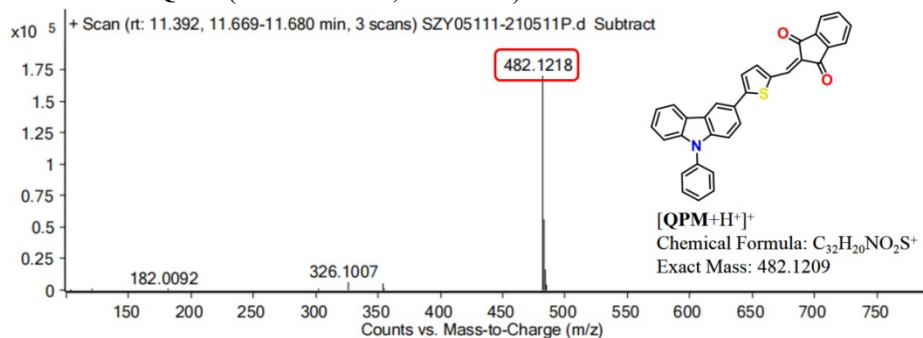

Fig. S3 HR-MS of QPM.

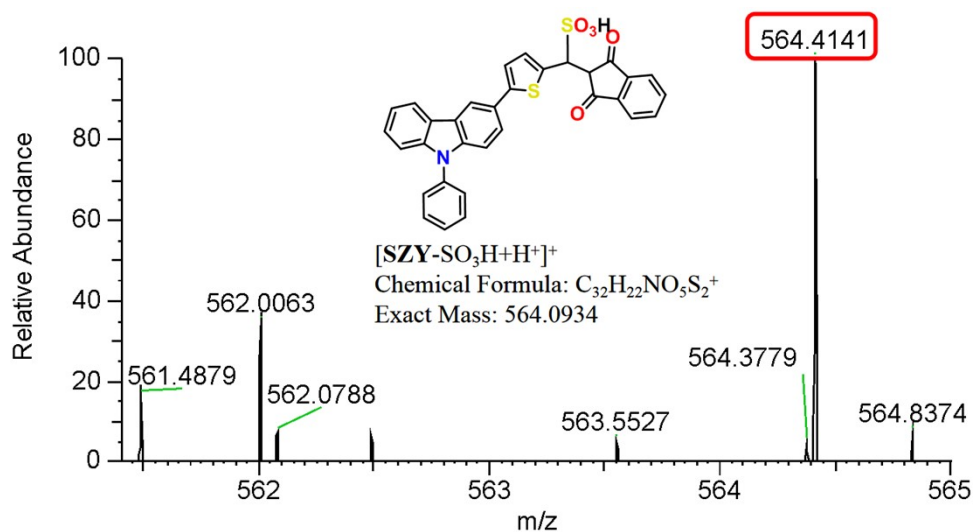

Fig. S4 HR-MS of QPM (10  $\mu\text{M}$ ) in the presence of  $\text{HSO}_3^-$  in Tris buffer solution (Tris:DMSO=7:3, pH=7.4, containing 1 mM CTAB).

## Theoretical computations

The ground state structures of **QPM** and **QPM-SO<sub>3</sub>H** were optimized using the density functional theory (DFT) with the Beck's three-parameter hybrid functional with the Lee-Yang-Parr correlation functional (B3LYP). All atoms were treated with 6-31G(d,p) basis set. All quantum chemistry calculations were performed using the Gaussian 16 package.

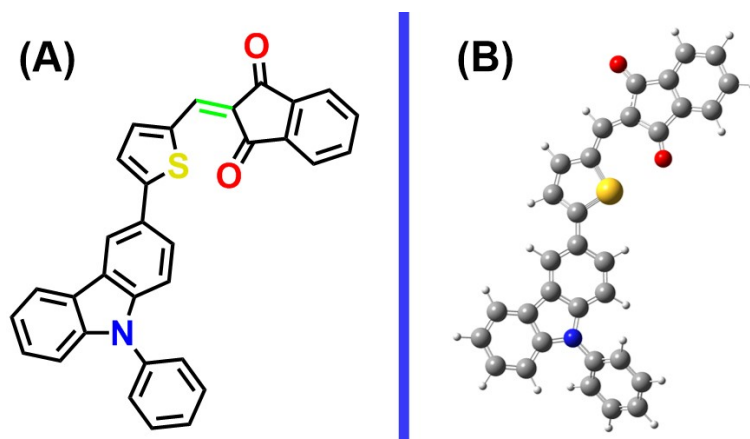

**Fig. S5** (A) Molecular structure of **QPM**, and (B) optimized molecular geometry of **QPM** in the ground state ( $S_0$ ) obtained from DFT calculations at B3LYP//6-31G(d,p) level of theory.

**Table S1** Cartesian coordinates of **QPM** in the ground state ( $S_0$ ).

| Coordinates (ground state $S_0$ ) |               |                       |              |              |
|-----------------------------------|---------------|-----------------------|--------------|--------------|
| Center Number                     | Atomic Number | Forces(Hartrees/Bohr) |              |              |
|                                   |               | X                     | Y            | Z            |
| 1                                 | 6             | -0.000002693          | -0.000003431 | 0.000000188  |
| 2                                 | 6             | -0.000001361          | 0.000003464  | 0.000001056  |
| 3                                 | 6             | 0.000004169           | -0.000001227 | -0.000000776 |
| 4                                 | 6             | -0.000006465          | -0.000000831 | 0.000001469  |
| 5                                 | 6             | -0.000004745          | 0.000000755  | -0.000000249 |
| 6                                 | 6             | 0.000003905           | 0.000000896  | -0.000000829 |
| 7                                 | 7             | 0.000010728           | 0.000019077  | 0.000000482  |
| 8                                 | 6             | -0.000012214          | -0.000011440 | 0.000002363  |
| 9                                 | 6             | 0.000007267           | 0.000000851  | 0.000001030  |
| 10                                | 6             | 0.000002786           | 0.000000590  | -0.000001038 |
| 11                                | 6             | -0.000001562          | 0.000000748  | 0.000000843  |
| 12                                | 6             | 0.000001491           | -0.000001337 | -0.000001293 |
| 13                                | 6             | -0.000001760          | 0.000000975  | -0.000001060 |
| 14                                | 6             | 0.000002917           | -0.000013654 | -0.000001435 |
| 15                                | 6             | -0.000001584          | 0.000003021  | 0.000001550  |
| 16                                | 6             | 0.000000417           | -0.000001018 | 0.000001426  |
| 17                                | 6             | 0.000000878           | -0.000000995 | 0.000001402  |

|    |    |              |              |              |
|----|----|--------------|--------------|--------------|
| 18 | 6  | 0.000000393  | -0.000000542 | 0.000000661  |
| 19 | 6  | 0.000000498  | 0.000002140  | 0.000001031  |
| 20 | 6  | -0.000004594 | -0.000001101 | -0.000001356 |
| 21 | 16 | 0.000004681  | 0.000003211  | -0.000000312 |
| 22 | 6  | 0.000000827  | -0.000001619 | 0.000004255  |
| 23 | 6  | -0.000000129 | 0.000001361  | -0.000001491 |
| 24 | 6  | -0.000000731 | -0.000000925 | -0.000001247 |
| 25 | 6  | -0.000002742 | -0.000002336 | -0.000002368 |
| 26 | 6  | 0.000002631  | 0.000002742  | -0.000003528 |
| 27 | 6  | -0.000001120 | -0.000004307 | -0.000000568 |
| 28 | 6  | 0.000000344  | 0.000003708  | 0.000001481  |
| 29 | 6  | -0.000001451 | -0.000002941 | 0.000001287  |
| 30 | 6  | 0.000002728  | 0.000002264  | 0.000000312  |
| 31 | 6  | -0.000003665 | 0.000001635  | -0.000002072 |
| 32 | 6  | 0.000001848  | -0.000003680 | -0.000000136 |
| 33 | 6  | 0.000002343  | 0.000004225  | -0.000000194 |
| 34 | 6  | -0.000003199 | -0.000000365 | -0.000001512 |
| 35 | 8  | -0.000000276 | -0.000001064 | -0.000000067 |
| 36 | 8  | -0.000000468 | 0.000002148  | -0.000001628 |
| 37 | 1  | 0.000000088  | 0.000000266  | -0.000000399 |
| 38 | 1  | 0.000000005  | -0.000000820 | 0.000000053  |
| 39 | 1  | -0.000000556 | -0.000000350 | 0.000000835  |
| 40 | 1  | -0.000000367 | -0.000000041 | -0.000000229 |
| 41 | 1  | 0.000000845  | -0.000000021 | 0.000000567  |
| 42 | 1  | 0.000000145  | -0.000001094 | -0.000000179 |
| 43 | 1  | -0.000000664 | -0.000000206 | -0.000000038 |
| 44 | 1  | 0.000000375  | -0.000000268 | 0.000000628  |
| 45 | 1  | 0.000000714  | 0.000000047  | 0.000001412  |
| 46 | 1  | 0.000000441  | -0.000000364 | 0.000001684  |
| 47 | 1  | 0.000000165  | -0.000000760 | 0.000001169  |
| 48 | 1  | 0.000000191  | -0.000000773 | 0.000000659  |
| 49 | 1  | -0.000000624 | -0.000000035 | -0.000000666 |
| 50 | 1  | -0.000000586 | 0.000000755  | -0.000000769 |
| 51 | 1  | 0.000000095  | 0.000000536  | -0.000001492 |
| 52 | 1  | 0.000000020  | 0.000000500  | -0.000000594 |
| 53 | 1  | -0.000000336 | 0.000001109  | -0.000000515 |
| 54 | 1  | -0.000000275 | 0.000000117  | -0.000000126 |
| 55 | 1  | 0.000000231  | 0.000000404  | 0.000000320  |

---

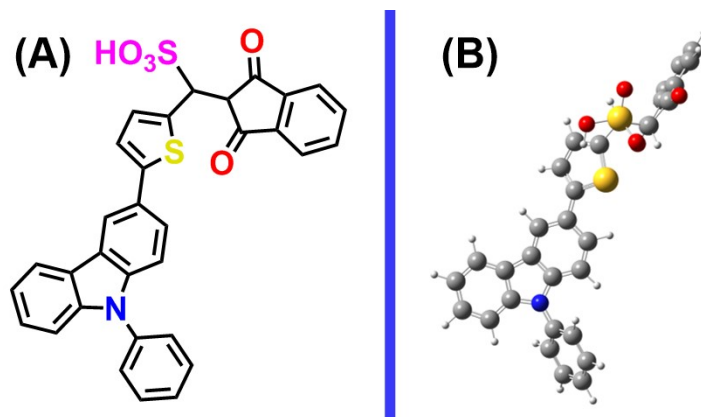

**Fig. S6** (A) Molecular structure of **QPM-SO<sub>3</sub>H**, and (B) optimized molecular geometry of **QPM-SO<sub>3</sub>H** in the ground state ( $S_0$ ) obtained from DFT calculations at B3LYP//6-31G(d,p) level of theory.

**Table S2** Cartesian coordinates of **QPM-SO<sub>3</sub>H** in the ground state ( $S_0$ ).

| Coordinates (ground state $S_0$ ) |               |                       |              |              |
|-----------------------------------|---------------|-----------------------|--------------|--------------|
| Center Number                     | Atomic Number | Forces(Hartrees/Bohr) |              |              |
|                                   |               | X                     | Y            | Z            |
| 1                                 | 6             | 0.000086206           | -0.000097580 | -0.000040240 |
| 2                                 | 6             | 0.000036091           | 0.000129648  | -0.000011567 |
| 3                                 | 6             | 0.000134083           | 0.000094185  | -0.000003643 |
| 4                                 | 6             | -0.000331713          | 0.000196627  | 0.000227075  |
| 5                                 | 6             | 0.000105981           | -0.000244753 | 0.000345223  |
| 6                                 | 6             | -0.000102467          | -0.000042826 | -0.000239690 |
| 7                                 | 7             | -0.000084028          | 0.000033936  | 0.000375645  |
| 8                                 | 6             | 0.000547240           | 0.000599816  | -0.000009580 |
| 9                                 | 6             | -0.000178439          | 0.000285314  | -0.000439098 |
| 10                                | 6             | -0.000050290          | 0.000021810  | 0.000112656  |
| 11                                | 6             | 0.000021008           | -0.000365910 | -0.000081372 |
| 12                                | 6             | -0.000181714          | -0.000044448 | -0.000102771 |
| 13                                | 6             | 0.000063293           | -0.000161610 | 0.000201165  |
| 14                                | 6             | -0.000146194          | -0.000786052 | -0.000565446 |
| 15                                | 6             | -0.000100779          | -0.000040123 | 0.000024927  |
| 16                                | 6             | -0.000063514          | 0.000047217  | 0.000031086  |
| 17                                | 6             | -0.000039241          | 0.000130766  | 0.000023503  |
| 18                                | 6             | 0.000191598           | -0.000040665 | 0.000009296  |
| 19                                | 6             | 0.000173592           | 0.000040991  | 0.000046261  |
| 20                                | 6             | 0.000639446           | 0.000106654  | -0.000146534 |
| 21                                | 16            | -0.000338508          | 0.000772302  | 0.000296345  |
| 22                                | 6             | -0.000147084          | -0.000381415 | 0.000429400  |
| 23                                | 6             | 0.000252200           | -0.000157797 | 0.000075888  |
| 24                                | 6             | 0.000079193           | 0.000164993  | -0.000134023 |
| 25                                | 6             | -0.000655531          | -0.000329924 | -0.000375630 |
| 26                                | 6             | 0.000124184           | 0.000029624  | 0.000006026  |
| 27                                | 6             | 0.000116724           | 0.000163546  | 0.000346176  |



|    |    |              |              |              |
|----|----|--------------|--------------|--------------|
| 28 | 6  | 0.000021425  | 0.000268854  | -0.000021835 |
| 29 | 6  | -0.000143015 | 0.000200717  | 0.000135274  |
| 30 | 6  | 0.000277367  | -0.000635531 | -0.000486060 |
| 31 | 6  | 0.000139515  | -0.000072882 | -0.000128212 |
| 32 | 6  | -0.000058585 | -0.000138103 | 0.000081326  |
| 33 | 6  | -0.000008781 | -0.000172638 | 0.000117683  |
| 34 | 6  | -0.000010333 | 0.000088616  | -0.000084139 |
| 35 | 8  | -0.000155546 | 0.000346667  | 0.000339740  |
| 36 | 8  | -0.000260626 | 0.000048389  | -0.000210769 |
| 37 | 16 | 0.000355687  | -0.000427344 | 0.000349200  |
| 38 | 8  | -0.000152972 | 0.000157242  | -0.000203823 |
| 39 | 8  | -0.000268989 | 0.000291707  | 0.000002285  |
| 40 | 8  | 0.000334778  | 0.000100172  | -0.000101311 |
| 41 | 1  | -0.000011979 | 0.000024309  | -0.000015743 |
| 42 | 1  | -0.000017863 | -0.000008514 | 0.000022203  |
| 43 | 1  | 0.000029901  | -0.000040642 | -0.000067518 |
| 44 | 1  | -0.000013454 | 0.000017034  | 0.000048968  |
| 45 | 1  | -0.000074655 | -0.000065465 | -0.000034801 |
| 46 | 1  | -0.000145302 | 0.000063349  | -0.000059161 |
| 47 | 1  | 0.000153299  | 0.000138029  | 0.000066109  |
| 48 | 1  | -0.000001297 | 0.000052252  | 0.000011498  |
| 49 | 1  | 0.000024912  | -0.000022087 | -0.000032201 |
| 50 | 1  | -0.000015122 | -0.000005518 | -0.000006705 |
| 51 | 1  | -0.000028302 | -0.000043969 | -0.000001550 |
| 52 | 1  | -0.000041471 | 0.000026103  | 0.000030654  |
| 53 | 1  | 0.000027671  | 0.000011575  | 0.000023866  |
| 54 | 1  | -0.000046644 | -0.000165514 | -0.000038023 |
| 55 | 1  | 0.000104949  | 0.000126129  | -0.000173731 |
| 56 | 1  | 0.000186906  | -0.000106686 | 0.000159647  |
| 57 | 1  | -0.000045966 | -0.000009112 | -0.000012467 |
| 58 | 1  | -0.000009269 | 0.000027330  | 0.000000108  |
| 59 | 1  | 0.000017984  | -0.000002649 | -0.000014249 |
| 60 | 1  | 0.000038561  | 0.000006383  | -0.000004156 |
| 61 | 1  | -0.000354124 | -0.000202530 | -0.000093186 |

---

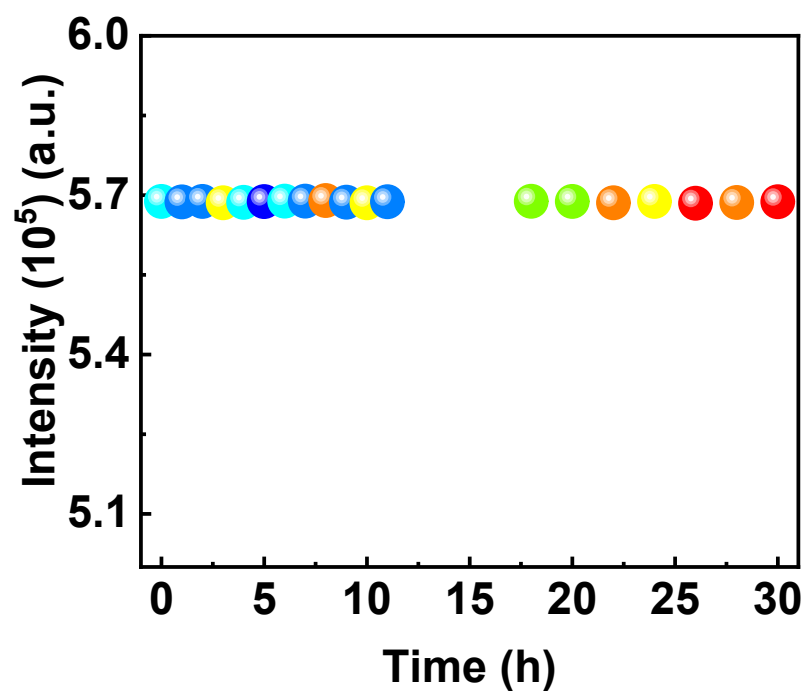

**Fig. S7** Fluorescence changes of QPM (10 μM) at different time in Tris buffer solution (Tris:DMSO=7:3, pH=7.4, containing 1 mM CTAB). The intensities were recorded at 710 nm, excitation was performed at 490 nm.

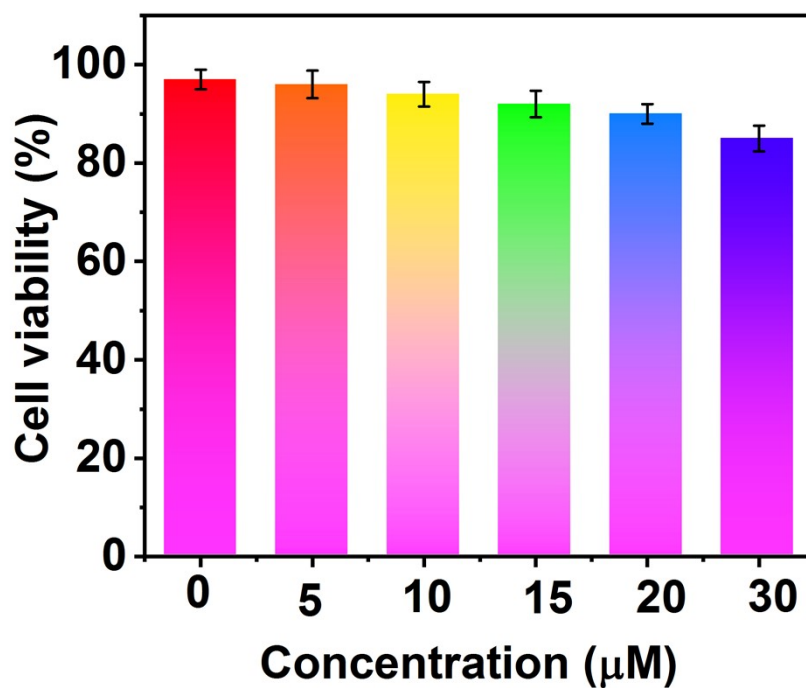

**Fig. S8** The viability of A549 cells incubated with QPM (0–30 μM) for 24 h.

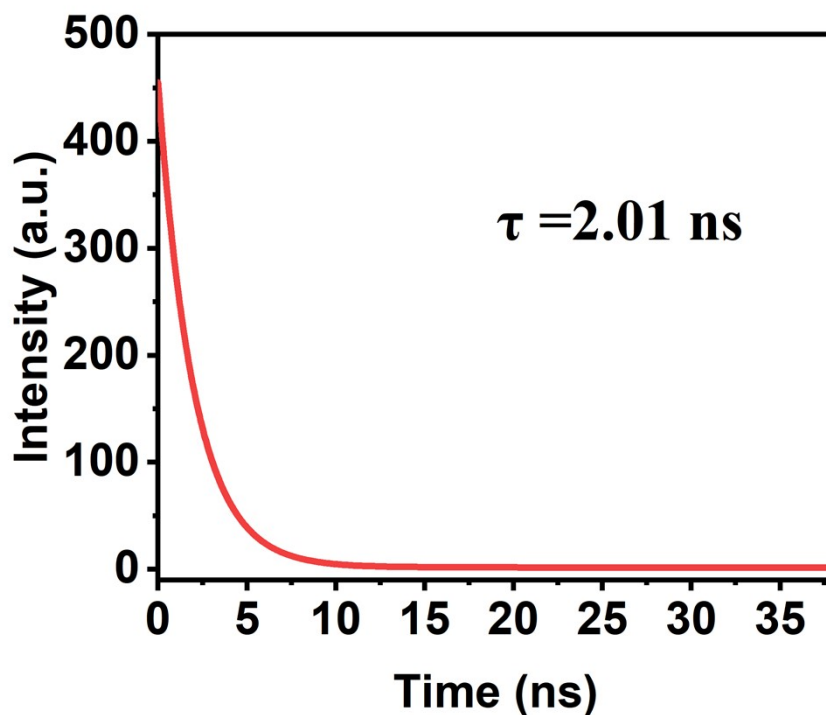

Fig. S9 The photoexcited decay curves of QPM.

Table S3. Comparison of this work with reported fluorescent probes for  $\text{HSO}_3^-$  detection.

| Probes  | Emission wavelength | Detection limit    | Response time | Detection of $\text{HSO}_3^-$ in live animals | Detection of $\text{HSO}_3^-$ in food samples | Ref. |
|---------|---------------------|--------------------|---------------|-----------------------------------------------|-----------------------------------------------|------|
| BFO-SFT | 515 nm              | 152 nM             | 20 min        | Mouse                                         | No                                            | S3   |
| NG-TCF  | 550 nm/670 nm       | 1.53 $\mu\text{M}$ | 7 min         | No                                            | No                                            | S4   |
| probe 1 | 530 nm/590 nm       | 0.37 $\mu\text{M}$ | 30 s          | Zebrafish                                     | Yes                                           | S5   |
| PCPT    | 568 nm/648 nm       | 80.5 nM            | 15 min        | No                                            | No                                            | S6   |
| NBIS    | 534 nm/610 nm       | 16.2 nM            | 12 min        | No                                            | No                                            | S7   |
| BCVTI   | 608 nm              | 3.3 nM             | 4 min         | No                                            | No                                            | S8   |
| HDI     | 460 nm/565 nm       | 80 nM              | 2 min         | No                                            | No                                            | S9   |
| DQ      | 620 nm              | 0.11 $\mu\text{M}$ | 15 s          | No                                            | No                                            | S10  |
| CMQ     | 640 nm              | 15.6 nM            | 5 s           | Zebrafish                                     | No                                            | S11  |

|                  |               |                         |              |                 |     |                  |
|------------------|---------------|-------------------------|--------------|-----------------|-----|------------------|
| <b>probe 1</b>   | 450 nm/594 nm | 3.21 $\mu$ M            | 2.5 min      | No              | No  | S12              |
| <b>Ru-azo</b>    | 635 nm        | 0.69 $\mu$ M            | 60 min       | No              | No  | S13              |
| <b>probe 1</b>   | 514 nm        | 22.8 nM                 | 10 s         | No              | No  | S14              |
| <b>MS-Bindol</b> | 490 nm        | 0.2 nM                  | 90 s         | No              | Yes | S15              |
| <b>MITO-TPE</b>  | 455 nm        | 27.22 $\mu$ M           | 20 s         | Zebrafish       | No  | S16              |
| <b>Hcy-Mo</b>    | 596 nm        | 80 nM                   | 30 s         | Mouse           | No  | S17              |
| <b>RBC</b>       | 456 nm/583 nm | $6.6 \times 10^{-8}$ M  | 35 s         | No              | No  | S18              |
| <b>TBQN</b>      | 514 nm        | $3.19 \times 10^{-8}$ M | 3 min        | No              | No  | S19              |
| <b>Q5</b>        | 485 nm/650 nm | 89 nM                   | within 0.5 h | No              | No  | S20              |
| <b>QPM</b>       | 710 nm        | 58 nM                   | 45 s         | Zebrafish/mouse | Yes | <b>This work</b> |

## References:

- [S1] H. Feng, Y. Wang, J. Liu, Z. Zhang, X. Yang, R. Chen, Q. Meng and R. Zhang, *J. Mater. Chem. B*, 2019, **7**, 3909–3916.
- [S2] F. Zhou, H. Feng, H. Li, Y. Wang, Z. Zhang, W. Kang, H. Jia, X. Yang, Q. Meng and R. Zhang, *ACS Omega*, 2020, **5**, 5452–5459.
- [S3] M. Guo, L. Wei, J. Shen, X. Liu, M. Abbas, Y. Yang, C. Xu, B. Wang and H. Zhu, *Dyes Pigm.*, 2022, **202**, 110261.
- [S4] L. Yang, N. Yang, P. Gu, Y. Zhang, X. Gong, S. Zhang, J. Li, L. Ji and G. He, *Bioorg. Chem.*, 2022, **123**, 105801.
- [S5] X. Li, J. Yan, W. Wu, X. Zhao, Y. Wang, Y. Fan and Z. Xu, *Microchem. J.*, 2022, **181**, 107653.
- [S6] W. Sun, N. Li, Z. Li, Y. Yuan, J. Miao, B. Zhao and Z. Lin, *Dyes Pigm.*, 2020,

**182**, 108658.

[S7] Z. Li, X. Cui, Y. Yan, Q. Che, J. Miao, B. Zhao and Z. Lin, *Dyes Pigm.*, 2021,

**188**, 109180.

[S8] F. Li, L. Zou, J. Xu, F. Liu, X. Zhang, H. Li, G. Zhang and X. Duan, *J. Photoch.*

*Photobio. A*, 2021, **411**, 113201.

[S9] L. Wang, W. Yang, Y. Song, Y. Gu and Y. Hu, *Spectrochim. Acta A*, 2020, **225**,

117495.

[S10] C. Zhang, L. Han, Q. Liu, M. Liu, B. Gu and Y. Shen, *Spectrochim. Acta A*,

2021, **253**, 119561.

[S11] X. Bao, X. Cao, Y. Yuan, B. Zhou and C. Huo, *J. Agric. Food Chem.*, 2021,

**69**, 4903–4910.

[S12] X. Mu, J. Zhu, L. Yan and N. Tang, *Luminescence*, 2021, **36**, 923–927.

[S13] W. Zhang, X. Xi, Y. Wang, Z. Du, C. Liu, J. Liu, B. Song, J. Yuan and R.

Zhang, *Dalton Trans.*, 2020, **49**, 5531–5538.

[S14] M. Wu, X. Wei, Y. Wei, R. Sun, Y. Xu and J. Ge, *Anal. Methods*, 2019, **11**,

4334–4340.

[S15] X. Zhang, L. Zhang, S. Liu, X. Zhu, P. Zhou, X. Cheng, R. Zhang, L. Zhang

and L. Chen, *J. Hazard. Mater.*, 2022, **423**, 127179.

[S16] X. Yang, J. Tang, D. Zhang, X. Han, J. Liu, J. Li, Y. Zhao and Y. Ye, *Chem.*

*Commun.*, 2020, **56**, 13217–13220.

[S17] R. Zhou, G. Cui, Y. Hu, Q. Qi, W. Huang and L. Yang, *RSC Adv.*, 2020, **10**,

25352–25357.

- [S18] D. Yang, X. He, X. Wu, H. Shi, J. Miao, B. Zhao and Z. Lin, *J. Mater. Chem. B*, 2020, **8**, 5722–5728.
- [S19] Y. Liu, L. Wu, Y. Dai, Y. Li, S. Qi, J. Du, Q. Yang, H. Xu and Y. Li, *Anal. Methods*, 2021, **13**, 3667-3675.
- [S20] J. Zhu, F. Qin, D. Zhang, J. Tang, W. Liu, W. Cao and Y. Ye, *New J. Chem.*, 2019, **43**, 16806–16811.
